# Supplementary material for: Lewis base controlled supramolecular architectures via non-covalent interactions of dioxomolybdenum(vi) complexes with an ONS donor ligand: DFT calculations and biological study
Source: Royal Society of Chemistry journal article supplement (doi:10.1039/c4nj02225d), 2015-01-01
Supplement: c4nj02225d1.pdf [file c4nj02225d1.pdf]

Electronic Supplementary Information (ESI)

New Journal of Chemistry

**Lewis base controlled supramolecular architectures via non-covalent interactions of dioxomolybdenum(VI) complexes with an ONS donor ligand: DFT Calculations and Biological Study**

Debanjana Biswal<sup>a</sup>, Nikhil Ranjan Pramanik<sup>\*b</sup>, Syamal Chakrabarti<sup>\*a</sup>, Nirmalya Chakraborty<sup>c</sup>, Krishnendu Acharya<sup>c</sup>, Sudhanshu Sekhar Mandal<sup>a</sup>, Saktiprosad Ghosh<sup>a</sup>, Michael G.B Drew<sup>d</sup>, Tapan Kumar Mondal<sup>e</sup> and Sujan Biswas<sup>e</sup>

<sup>a</sup>*Department of Chemistry, University College of Science, 92, Acharya Prafulla Chandra Road, Kolkata:700009, West Bengal, India.*

<sup>b</sup>*Department of Chemistry, Bidhannagar College, EB-2, Salt Lake, Kolkata: 700064, India.*

<sup>c</sup>*Molecular and Applied Mycology and Plant Pathology Laboratory, Department of Botany, University of Calcutta, Kolkata 700019, West Bengal, India.*

<sup>d</sup>*Department of Chemistry, The University of Reading, Whiteknights, Reading RG66AD, UK.*

<sup>e</sup>*Department of Chemistry (Inorganic section), Jadavpur University, Kolkata 700032, India.*

---

**Table of Contents:**

Table S1: Energy and composition of selected molecular orbitals of complex **1**.

Table S2: Energy and composition of selected molecular orbitals of complex **2**.

Table S3: Energy and composition of selected molecular orbitals of complex **3**.

Table S4: Energy and composition of selected molecular orbitals of complex **4**.

Table S5: Energy and composition of selected molecular orbitals of complex **5**.

**Table S1**Energy and composition of selected molecular orbitals of complex **1**.

| MOs     | Energy (eV) | % of composition |            |     |     |
|---------|-------------|------------------|------------|-----|-----|
|         |             | Mo               | L          | THF | Oxo |
| LUMO+5  | -0.30       | 13               | 83         | 0   | 04  |
| LUMO+4  | -0.62       | 16               | 78         | 0   | 06  |
| LUMO+3  | -1.71       | 59               | 17         | 01  | 23  |
| LUMO+2  | -1.82       | 22               | 68         | 0   | 10  |
| LUMO+1  | -2.30       | 58               | 22         | 0   | 20  |
| LUMO    | -2.41       | 43               | 33         | 0   | 24  |
| HOMO    | -6.00       | 02               | 96 (S, 26) | 01  | 01  |
| HOMO-1  | -6.48       | 01               | 94 (S, 42) | 01  | 04  |
| HOMO-2  | -6.53       | 01               | 97 (S, 56) | 01  | 01  |
| HOMO-3  | -6.58       | 01               | 97         | 01  | 01  |
| HOMO-4  | -7.01       | 0                | 100        | 0   | 0   |
| HOMO-5  | -7.10       | 02               | 69         | 21  | 08  |
| HOMO-6  | -7.31       | 01               | 20         | 73  | 06  |
| HOMO-7  | -7.46       | 0                | 98         | 0   | 01  |
| HOMO-8  | -7.81       | 09               | 77 (S, 49) | 03  | 11  |
| HOMO-9  | -7.93       | 03               | 08         | 04  | 85  |
| HOMO-10 | -8.29       | 05               | 62         | 01  | 32  |

**Table S2**Energy and composition of selected molecular orbitals of complex **2**.

| MOs     | Energy (eV) | % of composition |            |     |     |
|---------|-------------|------------------|------------|-----|-----|
|         |             | Mo               | L          | imz | Oxo |
| LUMO+5  | -0.18       | 02               | 98         | 0   | 0   |
| LUMO+4  | -0.52       | 10               | 86         | 0   | 04  |
| LUMO+3  | -1.44       | 60               | 14         | 02  | 24  |
| LUMO+2  | -1.61       | 19               | 73         | 0   | 08  |
| LUMO+1  | -2.06       | 54               | 24         | 0   | 22  |
| LUMO    | -2.25       | 49               | 27         | 01  | 23  |
| HOMO    | -5.80       | 01               | 96 (S, 25) | 02  | 01  |
| HOMO-1  | -6.29       | 0                | 96 (S, 24) | 01  | 03  |
| HOMO-2  | -6.38       | 01               | 90 (S, 71) | 07  | 02  |
| HOMO-3  | -6.69       | 0                | 07         | 92  | 01  |
| HOMO-4  | -6.72       | 01               | 93         | 01  | 05  |
| HOMO-5  | -6.95       | 03               | 87         | 01  | 09  |
| HOMO-6  | -6.97       | 0                | 100        | 0   | 0   |
| HOMO-7  | -7.27       | 0                | 97         | 01  | 02  |
| HOMO-8  | -7.55       | 02               | 11         | 19  | 68  |
| HOMO-9  | -7.59       | 07               | 75 (S, 41) | 04  | 14  |
| HOMO-10 | -8.00       | 03               | 26         | 59  | 12  |

**Table S3**Energy and composition of selected molecular orbitals of complex **3**.

| MOs     | Energy (eV) | % of composition |            |          |     |
|---------|-------------|------------------|------------|----------|-----|
|         |             | Mo               | L          | allylimz | Oxo |
| LUMO+5  | -0.33       | 0                | 01         | 99       | 0   |
| LUMO+4  | -0.51       | 09               | 87         | 0        | 04  |
| LUMO+3  | -1.41       | 60               | 14         | 02       | 24  |
| LUMO+2  | -1.59       | 20               | 72         | 0        | 08  |
| LUMO+1  | -2.04       | 54               | 24         | 0        | 22  |
| LUMO    | -2.23       | 49               | 27         | 01       | 23  |
| HOMO    | -5.77       | 01               | 96 (S, 25) | 02       | 01  |
| HOMO-1  | -6.27       | 01               | 94 (S, 25) | 02       | 03  |
| HOMO-2  | -6.36       | 01               | 88 (S, 68) | 09       | 02  |
| HOMO-3  | -6.63       | 0                | 09         | 90       | 01  |
| HOMO-4  | -6.72       | 01               | 93         | 01       | 05  |
| HOMO-5  | -6.93       | 02               | 88         | 01       | 09  |
| HOMO-6  | -6.97       | 0                | 100        | 0        | 0   |
| HOMO-7  | -7.25       | 0                | 97         | 01       | 02  |
| HOMO-8  | -7.53       | 03               | 14         | 22       | 61  |
| HOMO-9  | -7.56       | 06               | 66 (S, 32) | 08       | 20  |
| HOMO-10 | -7.78       | 02               | 10         | 83       | 05  |

**Table S4**Energy and composition of selected molecular orbitals of complex **4**.

| MOs     | Energy (eV) | % of composition |            |     |     |
|---------|-------------|------------------|------------|-----|-----|
|         |             | Mo               | L          | pic | Oxo |
| LUMO+5  | -0.60       | 06               | 33         | 59  | 02  |
| LUMO+4  | -1.05       | 04               | 01         | 94  | 01  |
| LUMO+3  | -1.63       | 58               | 15         | 03  | 24  |
| LUMO+2  | -1.75       | 19               | 72         | 02  | 07  |
| LUMO+1  | -2.18       | 57               | 23         | 0   | 20  |
| LUMO    | -2.36       | 44               | 31         | 02  | 23  |
| HOMO    | -5.90       | 01               | 96 (S, 25) | 02  | 01  |
| HOMO-1  | -6.39       | 01               | 95 (S, 32) | 01  | 03  |
| HOMO-2  | -6.44       | 01               | 95 (S, 66) | 02  | 02  |
| HOMO-3  | -6.77       | 01               | 97         | 0   | 02  |
| HOMO-4  | -6.98       | 0                | 100        | 0   | 0   |
| HOMO-5  | -7.05       | 03               | 84         | 02  | 11  |
| HOMO-6  | -7.36       | 0                | 79         | 18  | 03  |
| HOMO-7  | -7.48       | 0                | 98         | 02  | 0   |
| HOMO-8  | -7.64       | 04               | 43         | 21  | 32  |
| HOMO-9  | -7.68       | 05               | 35 (S, 27) | 21  | 39  |
| HOMO-10 | -7.97       | 01               | 07         | 76  | 16  |

**Table S5**Energy and composition of selected molecular orbitals of complex **5**.

| MOs     | Energy (eV) | % of composition |            |    |     |
|---------|-------------|------------------|------------|----|-----|
|         |             | Mo               | L          | py | Oxo |
| LUMO+5  | -0.65       | 01               | 06         | 93 | 0   |
| LUMO+4  | -1.16       | 05               | 01         | 93 | 01  |
| LUMO+3  | -1.64       | 58               | 14         | 04 | 24  |
| LUMO+2  | -1.78       | 19               | 72         | 02 | 07  |
| LUMO+1  | -2.21       | 57               | 23         | 0  | 20  |
| LUMO    | -2.39       | 44               | 31         | 02 | 23  |
| HOMO    | -5.95       | 02               | 94 (S, 25) | 02 | 02  |
| HOMO-1  | -6.41       | 01               | 95 (S, 26) | 01 | 03  |
| HOMO-2  | -6.50       | 01               | 97 (S, 59) | 01 | 01  |
| HOMO-3  | -6.75       | 0                | 97         | 01 | 02  |
| HOMO-4  | -6.89       | 0                | 100        | 0  | 0   |
| HOMO-5  | -7.07       | 03               | 83         | 02 | 12  |
| HOMO-6  | -7.39       | 0                | 86         | 11 | 03  |
| HOMO-7  | -7.55       | 0                | 13         | 86 | 01  |
| HOMO-8  | -7.68       | 05               | 53 (S, 23) | 17 | 25  |
| HOMO-9  | -7.75       | 05               | 30 (S, 23) | 11 | 54  |
| HOMO-10 | -8.19       | 06               | 42         | 13 | 39  |
